# Supplementary material
Source: bioRxiv or medRxiv preprint supplement (https://www.biorxiv.org/highwire/filestream/36178/field_highwire_adjunct_files/0/123174-1.pdf)
Supplement: Supplementary file [file 123174-1.pdf]

# Dewitt et al. Supplementary Figure 1

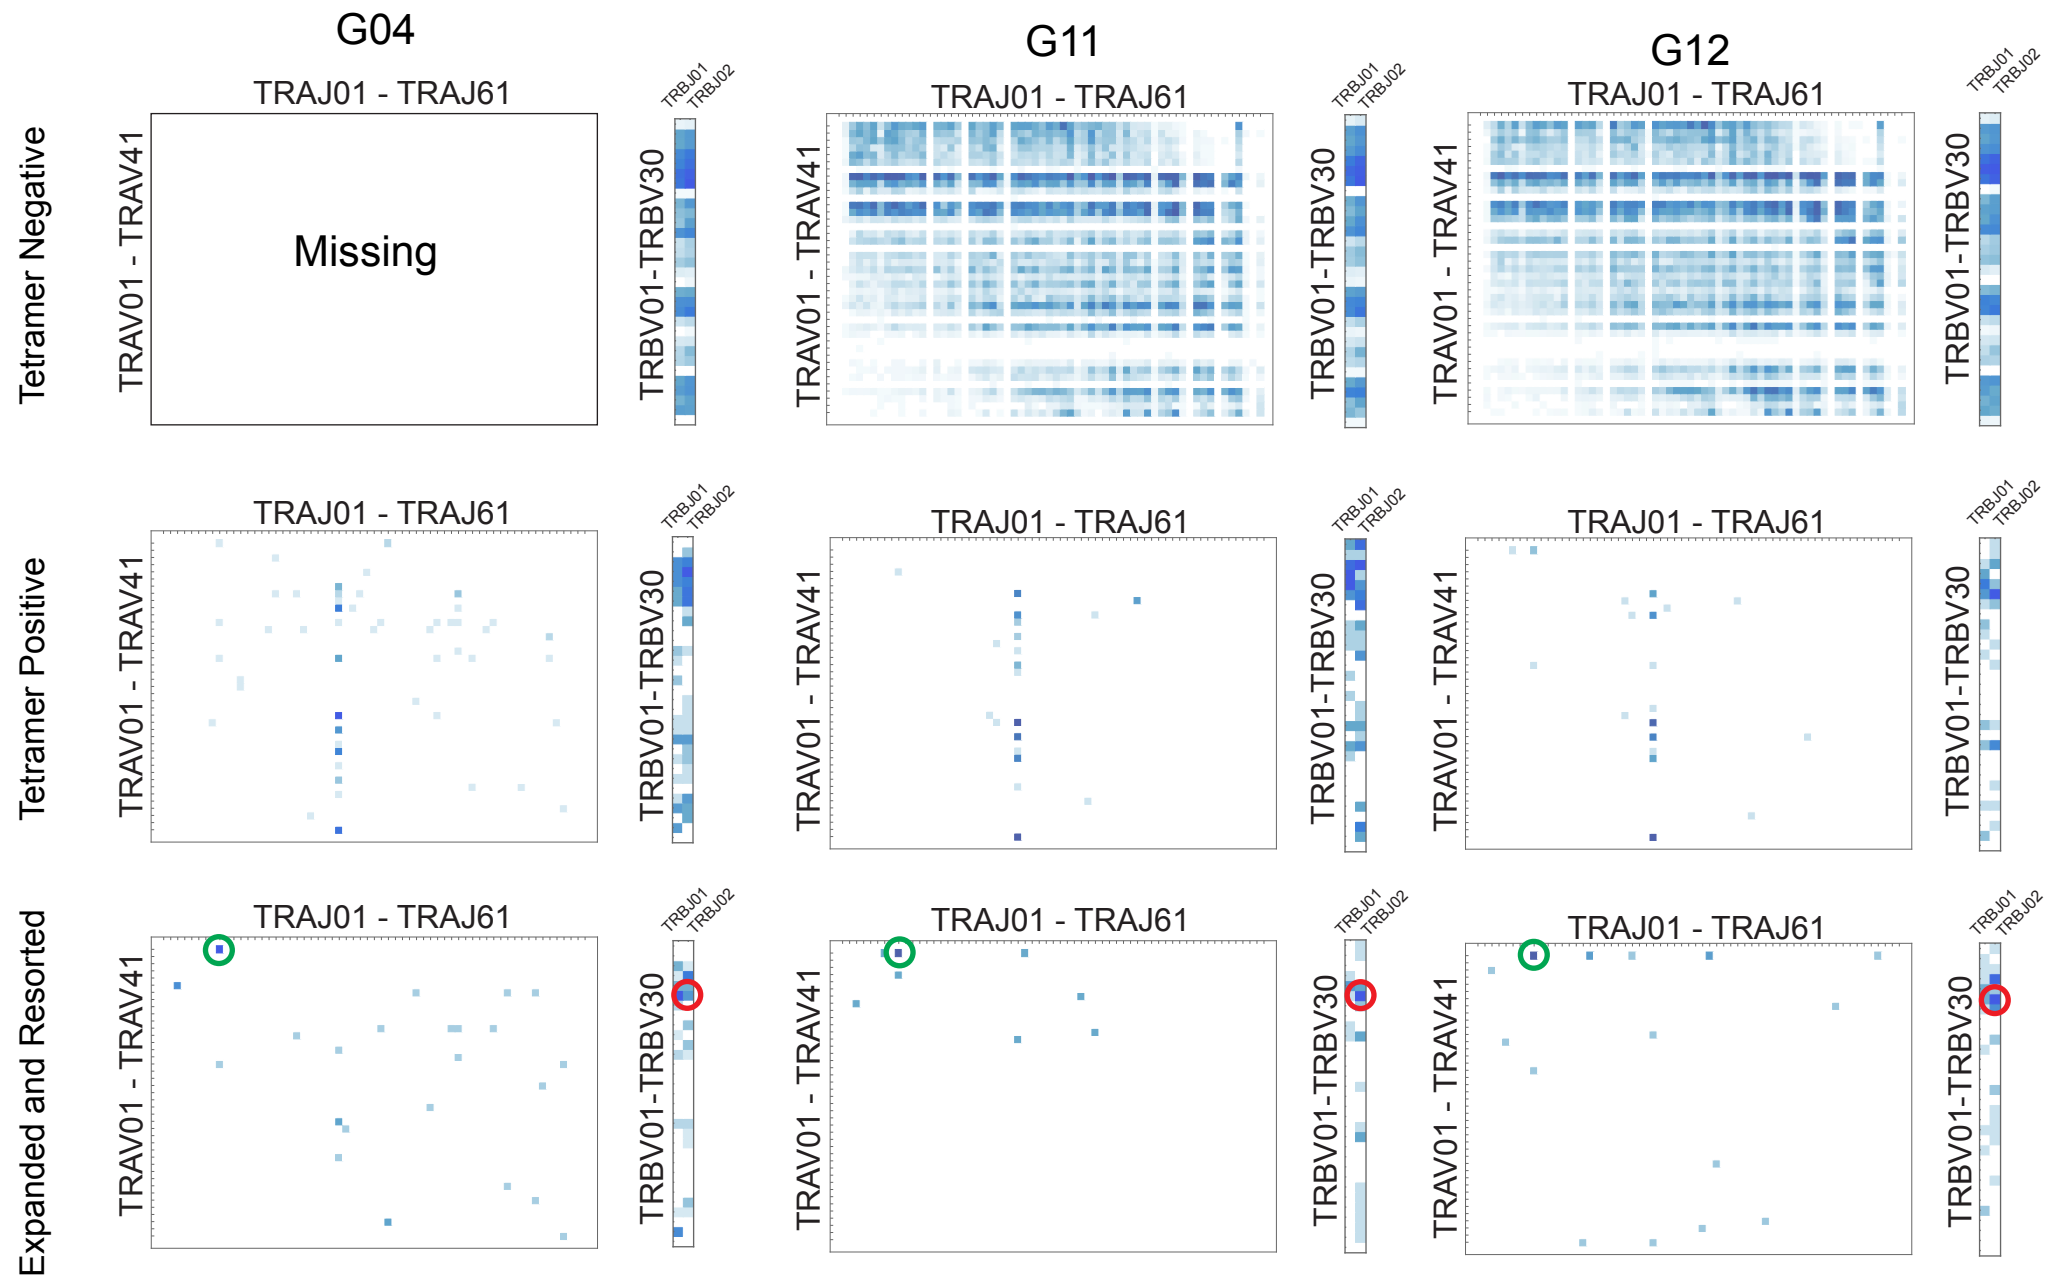

**Supplementary Figure 1. GMM-specific T-cell receptor diversity.** (A) Heatmaps showing the diversity of TRAV and TRAJ recombination events found among tetramer-negative, tetramer-positive, or expanded and resorted T cells obtained from three additional donors (G04, G11, and G12) with latent tuberculosis infection. Color scale indicates the relative abundance of each V/J combination. The green circle represents the conserved TRAV1-2 and TRAJ9 rearrangement, and the red circle represents the conserved TRBV6 and TRBJ2 rearrangement. The data for the remaining donor is shown in Figure 3 in the main text.

# Dewitt et al. Supplemental Figure 2

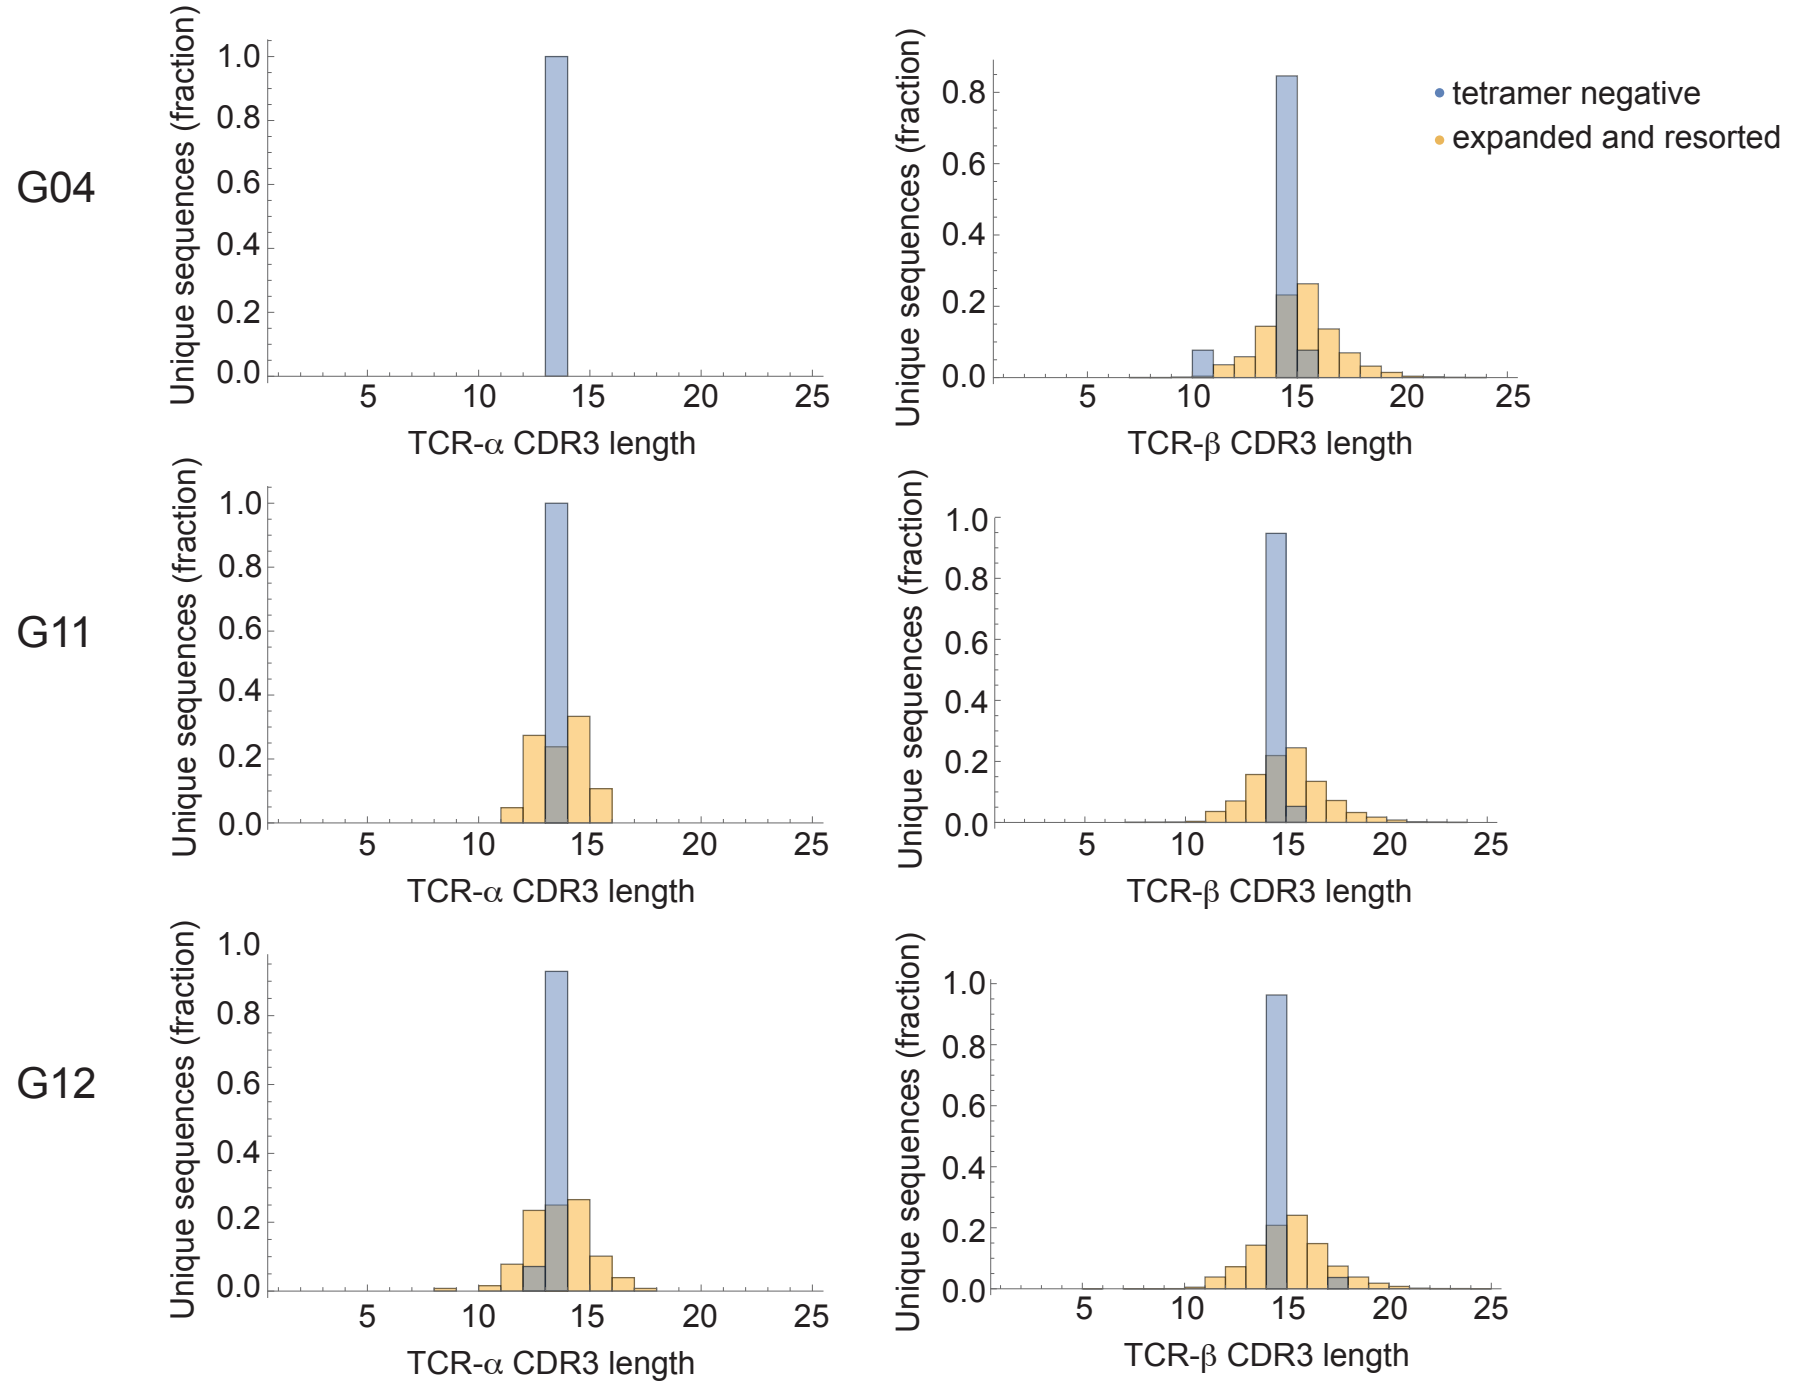

**Supplementary Figure 2. CDR3 length distribution among tetramer-negative or expanded and resorted T cells.** (A) Unique TCR- $\alpha$  sequences that included a TRAV1 and TRAJ9 rearrangement or (B) unique TCR- $\beta$  sequences that included a TRBV-6 and TRBJ2 rearrangement in three subjects with latent tuberculosis. Data for the remaining donor is shown in Figure 3C.

# Dewitt et al. Supplementary Figure 3

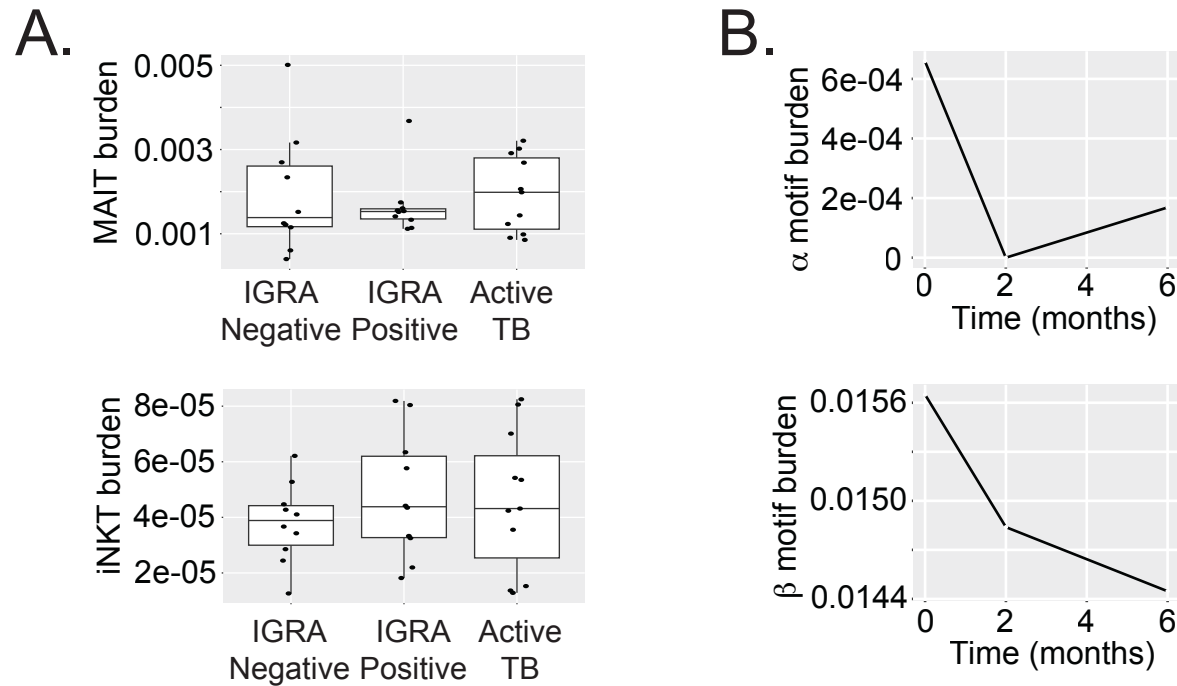

**Supplementary Figure 3. TCR- $\alpha$  motif burdens during tuberculosis infection, disease, and treatment.** (A) Burden of canonical MAIT or iNKT-specific TCR- $\alpha$  chain rearrangements in IGRA-negative, IGRA-positive, or active TB patients. MAIT sequences were identified based on usage of TRAV1-2 and TRAJ33 gene segments and a fixed CDR3 length. For iNKT, we restricted sequences based on usage of TRAV10 and TRAJ18 with 0 or 1 codon deletions and no insertions (Dellabona et al. *J. Exp Med* 1994). There was no difference in either MAIT or iNKT burden when comparing active TB patients to IGRA-negative subjects ( $p=0.81$  and  $p=0.39$ , respectively by ANOVA). (B) GMM-specific TCR- $\alpha$  and TCR- $\beta$  motif burden in PBMCs sampled from one patient with active tuberculosis at diagnosis (0 months), during treatment (2 months), and at the end of therapy (6 months).

# Dewitt et al. Supplementary Figure 4

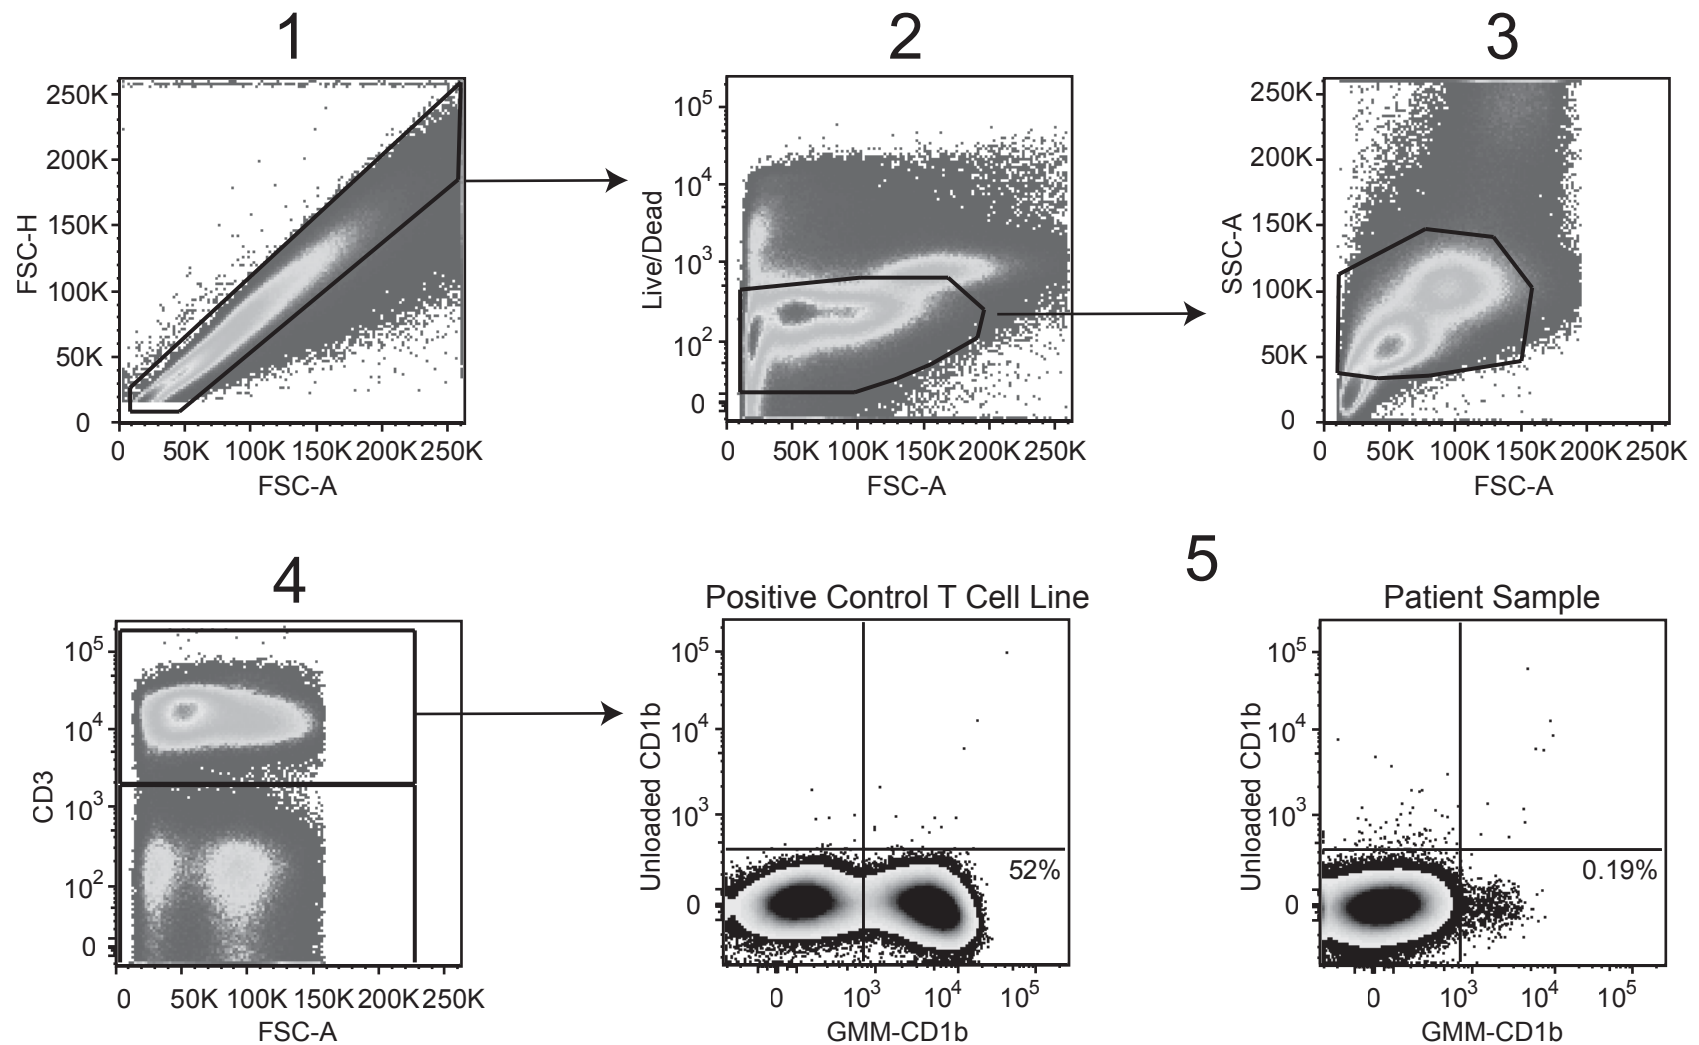

**Supplementary Figure 4. Ex vivo quantification of T cells that bind GMM-CD1B tetramer.** GMM-loaded CD1B tetramers were used to identify GMM-specific T cells from cryopreserved. Gating strategy proceeds from (1) single cell events to (2) viable cells (AVID Live/Dead) to (3) lymphocytes by size gating, and finally to (4) T cells. The frequency of (5) GMM-specific cells were identified within the CD3+ gate by co-staining with GMM-loaded and unloaded CD1B tetramers as a negative control. Shown here is a representative patient sample and a positive control T cell line.

| ID      | TCR- $\alpha$ motifs |         |             | incidence (fraction of unique TCRs) |                   | p-value  |
|---------|----------------------|---------|-------------|-------------------------------------|-------------------|----------|
|         | V                    | J       | CDR3 length | tetramer-negative                   | expanded/resorted |          |
| G10     | TCRAV01              | TCRAJ09 | 13          | 3/24613                             | 17/76             | 3.29E-41 |
|         | TCRAV08              | TCRAJ20 | 11          | 4/24613                             | 8/76              | 2.70E-18 |
|         | TCRAV10              | TCRAJ26 | 3           | 0/24613                             | 2/76              | 9.35E-06 |
|         | TCRAV17              | TCRAJ09 | 13          | 7/24613                             | 2/76              | 3.32E-04 |
|         | TCRAV25              | TCRAJ26 | 1           | 2/24613                             | 6/76              | 1.94E-14 |
|         | TCRAV25              | TCRAJ26 | 2           | 1/24613                             | 3/76              | 1.12E-07 |
|         | TCRAV38              | TCRAJ54 | 2           | 0/24613                             | 2/76              | 9.35E-06 |
| TCRAV41 | TCRAJ26              | 1       | 1/24613     | 3/76                                | 1.12E-07          |          |
| G11     | TCRAV01              | TCRAJ27 | 2           | 0/55066                             | 1/20              | 3.63E-04 |
|         | TCRAV01              | TCRAJ09 | 13          | 20/55066                            | 7/20              | 2.25E-19 |
|         | TCRAV07              | TCRAJ35 | 3           | 0/55066                             | 1/20              | 3.63E-04 |
|         | TCRDV03              | TCRAJ58 | 3           | 0/55066                             | 1/20              | 3.63E-04 |
| G12     | TCRAV01              | TCRAJ34 | 11          | 25/94785                            | 2/31              | 3.61E-05 |
|         | TCRAV01              | TCRAJ09 | 13          | 32/94785                            | 13/31             | 1.86E-36 |
|         | TCRAV01              | TCRAJ17 | 14          | 16/94785                            | 2/31              | 1.58E-05 |
|         | TCRAV03              | TCRAJ03 | 12          | 2/94785                             | 1/31              | 9.81E-04 |
|         | TCRAV12              | TCRAJ26 | 4           | 0/94785                             | 1/31              | 3.27E-04 |
|         | TCRAV30              | TCRAJ35 | 15          | 1/94785                             | 1/31              | 6.54E-04 |
|         | TCRAV41              | TCRAJ16 | 3           | 0/94785                             | 1/31              | 3.27E-04 |

| ID  | TCR- $\beta$ motifs |         |             | incidence (fraction of unique TCRs) |                   | p-value  |
|-----|---------------------|---------|-------------|-------------------------------------|-------------------|----------|
|     | V                   | J       | CDR3 length | tetramer negative                   | resorted/expanded |          |
| G04 | TCRBV04             | TCRBJ02 | 14          | 697/96689                           | 6/134             | 4.69E-04 |
|     | TCRBV04             | TCRBJ02 | 19          | 112/96689                           | 9/134             | 1.40E-13 |
|     | TCRBV06             | TCRBJ01 | 14          | 1413/96689                          | 43/134            | 1.48E-44 |
|     | TCRBV06             | TCRBJ02 | 14          | 1780/96689                          | 11/134            | 4.34E-05 |
|     | TCRBV30             | TCRBJ01 | 18          | 13/96689                            | 17/134            | 1.03E-41 |
| G10 | TCRBV01             | TCRBJ02 | 16          | 18/130339                           | 2/83              | 7.55E-05 |
|     | TCRBV04             | TCRBJ02 | 16          | 721/130339                          | 13/83             | 1.89E-15 |
|     | TCRBV04             | TCRBJ02 | 20          | 51/130339                           | 3/83              | 6.02E-06 |
|     | TCRBV06             | TCRBJ02 | 14          | 1878/130339                         | 46/83             | 1.06E-61 |
| G11 | TCRBV06             | TCRBJ02 | 14          | 1549/96810                          | 36/67             | 2.46E-46 |
|     | TCRBV26             | TCRBJ02 | 18          | 0/96810                             | 1/67              | 6.92E-04 |
| G12 | TCRBV04             | TCRBJ02 | 19          | 115/146215                          | 19/90             | 6.73E-40 |
|     | TCRBV04             | TCRBJ02 | 20          | 68/146215                           | 2/90              | 8.79E-04 |
|     | TCRBV06             | TCRBJ02 | 14          | 2406/146215                         | 26/90             | 5.02E-25 |
|     | TCRBV07             | TCRBJ02 | 19          | 241/146215                          | 6/90              | 1.20E-08 |
|     | TCRBV17             | TCRBJ02 | 17          | 0/146215                            | 1/90              | 6.15E-04 |

**Supplementary Table 1. Summary of our motif discovery framework.** At the subject level all putative motifs (combinations of V gene family, J gene family and CDR3 length) significant at p-value > 1e-3 are shown. The single motif enriched that was found to be enriched in all subjects (highlighted in red) was chosen for further analysis. Note: because of a missing sample, we used three subjects for TCR $\alpha$ , whereas we use all four for TCR $\beta$ .

| Clone | Variable    | CDR3                 | Joining    |
|-------|-------------|----------------------|------------|
| A12   | TRAV17*01   | CANAAIGGSRLTF        | TRAJ58*01  |
|       | TRBV4-1*01  | CASSQEGLRDRGQRGDGYTF | TRBJ1-2*01 |
| C6    | TRAV17*01   | CANAAIGGSRLTF        | TRAJ58*01  |
|       | TRBV4-1*01  | CASSQEGLRDRGQRGDGYTF | TRBJ1-2*01 |
| G2    | TRAV1-2*01  | CAVRNTGGFKTIF        | TRAJ9*01   |
|       | TRBV6-2*01  | CASTHRVGGETQYF       | TRBJ2-5*01 |
| G7    | TRAV12-2*02 | CAVKGFGNEKLTf        | TRAJ48*01  |
|       | TRBV4-1*01  | CASSHMGLAGSYSYNEQFF  | TRBJ2-1*01 |
| B10   | TRAV38-1*01 | CAFMKLGTYNQGGKLIF    | TRAJ23*01  |
|       | TRBV12-4*01 | CASSFPRRGVHSEAFF     | TRBJ1-1*01 |
| C8    | TRAV38-1*01 | CAFMKLGTYNQGGKLIF    | TRAJ23*01  |
|       | TRBV12-4*01 | CASSFPRRGVHSEAFF     | TRBJ1-1*01 |
| H6    | TRAV1-2*01  | CAVRNTGGFKTIF        | TRAJ9*01   |
|       | TRBV6-2*01  | CASTHRVGGETQYF       | TRBJ2-5*01 |

**Supplementary Table 2. Analysis of GMM-specific T-cell clones.** GMM-specific T cells were isolated from a fifth South African donor with latent tuberculosis and plated at limiting dilution to facilitate the isolation of T cell clones. After 28 days of in-vitro expansion with irradiated feeder cells, anti-CD3, and IL-2, we extracted RNA and transcribed RNA to cDNA. We used template switched PCR with gene specific primers targeting the constant region of TCR- $\alpha$  or TCR- $\beta$  to determine the full length TCR sequence (Jing L et al. *J Immunology* 2016). These sequences were queried against the IMGT online database determine TCR segment usage and CDR3 sequence (Yousfi Monod et al. *Bioinformatics* 2004). Shown are the TCR sequences for seven clones with those matching our defined motifs highlighted in yellow.

| CDR3 sequences of TCRs matching TCR $\alpha$ motif |               |                   |               |
|----------------------------------------------------|---------------|-------------------|---------------|
| tetramer-negative                                  |               | expanded/resorted |               |
| CAVIDTGGFKTIF                                      | CAVRGTGGFKTIF | CAARNTGGFKTIF     | CAVRGPGRFKTIF |
| CAVPRGGGFKTIF                                      | CAVRAPGGFKTIF | CAVRKTGGFKTIF     | CAVRGTGGFKTIF |
| CAVRGRGGFKTIF                                      | CAVPNTGGFKTIF | CAVRSLGGFKTIF     | CAVRGTGGFKTIF |
| CAVRDTGGFKTIF                                      | CAVRSTGGFKTIF | CAVRSLGGFKTIF     | CAVRGTGGFKTIF |
| CAVKHTGGFKTIF                                      | CVLMGAGGFKTIF | CAVRKTGGLKTIF     | CAVRGTGGFKTIF |
| CAVQNTGGFKTIF                                      | CAVRSPGGFKTIF | CAVRKTGGLKTIF     | CAVRGTGGFKTIF |
| CAASESGGFKTIF                                      | CAVRDTGGFKTIF | CAARNTGGLKTIF     | CAVRGTGGFKTIF |
| CAVRGTGGFKTIF                                      | CAVTGAGGFKTIF | CAARNTGGFKTIF     | CAVRLTGGFKTIF |
| CAASESGGFKTIF                                      | CAVRTTGGFKTIF | CAVRKPGRFKTIF     | CAVRNTGGFKTIF |
| CAVIGTGGFKTIF                                      | CAVGSTGGFKTIF | CAVRLTGGFKTIF     | CAVRGTGGFKTIF |
| CAVKETGGFKTIF                                      | CAVRGTGGFKTIF | CAVRNTGGFKTIF     | CAVRGTGGFKTIF |
| CAVLNTGGFKTIF                                      | CAVKGTGGFKTIF | CAVRNTGGFKTIF     | CAVRGTGGFKTIF |
| CAVPHTGGFKTIF                                      | CAVSYTGGFKTIF | CAVRLTGGLKTIF     | CAVRGTGGFKTIF |
| CAVWAPGGFKTIF                                      | CAVAGAGGFKTIF | CAVRLTGGFKTIF     | CAVRGTGGFKTIF |
| CAPRNTGGFKTIF                                      | CAVRGTGGFKTIF | CAERLTGGFKTIF     | CAVRGTGGFKTIF |
| CAVAYTGGFKTIF                                      | CAVRNTGGFKTIF | CAVRLTGGFKTIF     | CAVRGTGGFKTIF |
| CAVIITGGFKTIF                                      | CAVRSPGGFKTIF | CAVRLTGGFKTIF     | CAVRGTGGFKTIF |
| CAAKGTGGFKTIF                                      | CAVSNTGGFKTIF | CAVRNTGGFKTIF     | CAARGTGGFKTIF |
| CAAINTGGFKTIF                                      | CALGNTGGFKTIF | CAVRNIGGFKTIF     |               |
| CAVINTGGFKTIF                                      | CAVRHTGGFKTIF | CAVRLTGGFKTIF     |               |
| CAVRNTGGFKTIF                                      | CAVASTGGFKTIF | CAVRLTGGFKTIF     |               |
| CAVSHNTGGFKTIF                                     | CAVGNTGGFKTIF | CAVRNTGGFKTIF     |               |
| CAVRDTGGFKTIF                                      | CAVRGGGGFKTIF | CAVRLTGGFKAIL     |               |
| CAVRDTGGFKTIF                                      | CARGGTGGFKTIF | CAVRLTGGFTTIF     |               |
| CAVGDNTGGFKTIF                                     | CAVSYTGGFKTIF | CAVRLTGGFKTIY     |               |
| CAVAGTGGFKTIF                                      | CAVLNTGGFKTIF | CAARNTGGFKTIF     |               |
| CAPRHTGGFKTIF                                      | CAPINTGGFKTIF | CAVRGTGGFKTIF     |               |
| CAVLNIGGFKTIF                                      |               | CAVRGTGGFKTIF     |               |

**Supplementary Table 3. Enrichment of residues within the GMM-specific TCR- $\alpha$  motif.** This table summarizes unique CDR3 sequences that contain a TRAV1-2 and TRAJ09 rearrangement identified within tetramer-negative or expanded/resorted T cells from one donor with latent tuberculosis. Highlighted in red and blue are the arginine at position 4 and leucine at position 5, respectively.

|               | CDR3 position | Amino Acid | Fraction of unique TCRs with this amino acid at this position |                   | p-value  | enriched(+) suppressed(-) |
|---------------|---------------|------------|---------------------------------------------------------------|-------------------|----------|---------------------------|
|               |               |            | tetramer-negative                                             | expanded/resorted |          |                           |
| TCR- $\alpha$ | 4             | R          | 20/55                                                         | 46/46             | 3.90E-13 | +                         |
|               | 5             | L          | 0/55                                                          | 12/46             | 3.30E-05 | +                         |
| TCR- $\beta$  | 1             | C          | 7613/7613                                                     | 115/119           | 5.30E-08 | -                         |
|               | 1             | S          | 0/7613                                                        | 4/119             | 5.30E-08 | +                         |
|               | 3             | S          | 7321/7613                                                     | 85/119            | 8.70E-20 | -                         |
|               | 3             | T          | 158/7613                                                      | 33/119            | 2.40E-26 | +                         |
|               | 4             | Q          | 51/7613                                                       | 35/119            | 1.30E-42 | +                         |
|               | 4             | S          | 5195/7613                                                     | 26/119            | 7.90E-25 | -                         |
|               | 4             | R          | 1025/7613                                                     | 0/119             | 6.60E-08 | -                         |
|               | 4             | T          | 442/7613                                                      | 55/119            | 1.20E-34 | +                         |
|               | 5             | E          | 783/7613                                                      | 0/119             | 4.40E-06 | -                         |
|               | 5             | G          | 592/7613                                                      | 0/119             | 1.50E-04 | -                         |
|               | 5             | L          | 525/7613                                                      | 0/119             | 3.50E-04 | -                         |
|               | 5             | P          | 716/7613                                                      | 103/119           | 5.20E-85 | +                         |
|               | 5             | S          | 560/7613                                                      | 0/119             | 2.30E-04 | -                         |
|               | 5             | Y          | 1562/7613                                                     | 8/119             | 7.20E-05 | -                         |
|               | 6             | G          | 1913/7613                                                     | 0/119             | 3.20E-15 | -                         |
|               | 6             | R          | 772/7613                                                      | 106/119           | 3.90E-87 | +                         |
|               | 6             | T          | 683/7613                                                      | 0/119             | 2.60E-05 | -                         |
|               | 7             | A          | 570/7613                                                      | 0/119             | 2.40E-04 | -                         |
|               | 7             | G          | 2621/7613                                                     | 0/119             | 4.40E-22 | -                         |
|               | 7             | L          | 433/7613                                                      | 64/119            | 1.40E-45 | +                         |
|               | 7             | S          | 607/7613                                                      | 0/119             | 9.60E-05 | -                         |
|               | 7             | R          | 831/7613                                                      | 35/119            | 4.10E-08 | +                         |
|               | 7             | T          | 666/7613                                                      | 0/119             | 4.10E-05 | -                         |
|               | 7             | V          | 243/7613                                                      | 14/119            | 3.70E-05 | +                         |
|               | 8             | G          | 2518/7613                                                     | 98/119            | 6.30E-28 | +                         |
|               | 8             | S          | 867/7613                                                      | 1/119             | 2.30E-05 | -                         |
|               | 8             | R          | 549/7613                                                      | 0/119             | 0.00023  | -                         |
|               | 8             | W          | 54/7613                                                       | 7/119             | 3.80E-05 | +                         |
|               | 9             | A          | 734/7613                                                      | 0/119             | 1.10E-05 | -                         |
|               | 9             | G          | 943/7613                                                      | 111/119           | 1.30E-87 | +                         |
|               | 9             | T          | 1600/7613                                                     | 0/119             | 1.20E-12 | -                         |
|               | 9             | Y          | 517/7613                                                      | 0/119             | 0.00056  | -                         |
|               | 10            | E          | 825/7613                                                      | 27/119            | 0.00028  | +                         |
| 10            | D             | 1354/7613  | 84/119                                                        | 1.10E-35          | +        |                           |
| 10            | G             | 1243/7613  | 7/119                                                         | 0.00099           | -        |                           |
| 10            | N             | 1323/7613  | 0/119                                                         | 2.70E-10          | -        |                           |
| 10            | Y             | 2216/7613  | 0/119                                                         | 4.20E-18          | -        |                           |
| 11            | E             | 5109/7613  | 34/119                                                        | 1.90E-17          | -        |                           |
| 11            | T             | 2058/7613  | 77/119                                                        | 3.50E-17          | +        |                           |
| 13            | F             | 2286/7613  | 9/119                                                         | 3.60E-09          | -        |                           |
| 13            | Y             | 5172/7613  | 110/119                                                       | 2.50E-10          | +        |                           |

**Supplementary Table 4. Position-wise enrichment of TCR motifs.** For each position within the CDR3 of GMM-specific TCR- $\alpha$  and TCR- $\beta$  motifs, we tabulated the fraction of unique sequences with a particular amino acid at that position among tetramer-negative and expanded/resorted T cells. Statistical significance was computed using a Fisher's Exact test. The table summarizes those residues that were either enriched or suppressed among expanded and resorted T cells as compared to tetramer-negative T cells. These results are summarized graphically in Figure 4C and 4D of the main text.



| Adolescent With and Without Latent TB |     |        |           |          |      |
|---------------------------------------|-----|--------|-----------|----------|------|
| PTID                                  | Age | Sex    | Ethnicity | IGRA     | TST  |
| 09-0157                               | 13  | male   | Coloured  | Negative | 0    |
| 09-0292                               | 15  | female | Coloured  | Negative | 0    |
| 11-0083                               | 16  | female | White     | Negative | 0    |
| 02-0249                               | 14  | male   | Coloured  | Negative | 0    |
| 02-0319                               | 13  | male   | Coloured  | Negative | 0    |
| 02-0320                               | 13  | male   | Coloured  | Negative | 0    |
| 03-0324                               | 12  | male   | Black     | Negative | 0    |
| 03-0703                               | 17  | female | Black     | Negative | 0    |
| 01-0345                               | 14  | male   | Coloured  | Negative | 0    |
| 01-0381                               | 14  | female | Coloured  | Negative | 0    |
| 01-0457                               | 16  | male   | Coloured  | Positive | 14.9 |
| 03-0539                               | 12  | male   | Black     | Positive | 16.5 |
| 03-0558                               | 13  | male   | Black     | Positive | 13   |
| 01-0667                               | 15  | female | Coloured  | Positive | 15.5 |
| 09-0092                               | 13  | male   | Black     | Positive | 17   |
| 09-0306                               | 15  | male   | Coloured  | Positive | 19   |
| 01-0872                               | 13  | male   | Coloured  | Positive | 12   |
| 03-0709                               | 14  | female | Black     | Positive | 16   |
| 01-0959                               | 18  | female | Coloured  | Positive | 15   |
| 01-0272                               | 14  | male   | Coloured  | Positive | 12.4 |

| Adult With Active TB |     |     |           |              |                     |
|----------------------|-----|-----|-----------|--------------|---------------------|
| PTID                 | Age | Sex | Ethnicity | Sputum smear | TB Treatment (days) |
| TB-1052              | 32  | F   | Coloured  | 2+           | 3                   |
| TB-1100              | 36  | F   | Coloured  | 3+           | 6                   |
| TB-1103              | 31  | M   | Coloured  | 3+           | 3                   |
| TB-1104              | 30  | M   | Coloured  | 1+           | 5                   |
| TB-1107              | 37  | F   | Coloured  | 2+           | 6                   |
| TB-1108              | 21  | F   | Coloured  | 2+           | 6                   |
| TB-1112              | 31  | M   | Coloured  | 2+           | 6                   |
| TB-1117              | 31  | F   | Coloured  | 3+           | 6                   |
| TB-1119              | 19  | M   | Coloured  | 1+           | 6                   |
| TB-1124              | 41  | M   | Coloured  | 1+           | 5                   |
| TB-1126              | 20  | M   | Coloured  | 2+           | 3                   |

| Adults with Latent TB |     |     |           |          |           |
|-----------------------|-----|-----|-----------|----------|-----------|
| PTID                  | Age | Sex | Ethnicity | IGRA     | Cell line |
| DN020-11              | 27  | F   | Coloured  | Positive | G04       |
| PS 22-2002            | 24  | F   | Coloured  | Unknown  | G10       |
| PS 22-2003            | 42  | F   | Coloured  | Positive | G11       |
| PS 22-2004            | 45  | F   | White     | Negative | G12       |
| DN005-10              | 34  | M   | Black     | Positive | Clones    |

**Supplementary Table 5. Clinical and Demographic Characteristics of Study Subjects.** The results reported in this manuscript made use of archived samples from three South African cohorts. Immunosequencing and flow cytometry were performed on adolescents with (n=10) and without (n=10) latent tuberculosis and adults with active tuberculosis (n=10). T-Cell lines and clones were derived from five healthy adult donors with variable infection status. TST = Tuberculin Skin Test and IGRA = Interferon Gamma Release Assay, which are the two clinical assays used to define latent tuberculosis infection. Sputum smear is a semi-quantitative measure of bacterial burden in the sputum of patients with active tuberculosis. Ethnicity was self-described and 'coloured' refers to subjects of mixed-race ancestry in South Africa.
